# Supplementary material for: Lectin-Based Study Reveals the Presence of Disease-Relevant Glycoepitopes in Bladder Cancer Cells and Ectosomes
Source: MDPI journal article supplement (doi:10.3390/ijms232214368), 2022-11-19
Supplement: s1 [file s1]

## Supplementary Data: Lectin blotting results

**Methodology:** Lectin blotting was performed as described in [67]. In brief, material obtained from cultures of T-24 and HCV-29 cells previously maintained for 24 h in serum-free medium (i.e. the whole cell extracts, membrane protein fractions and ectosome samples) containing equal amount of protein (70 µg according to MicroBCA method) was separated by 10% SDS-PAGE under reducing conditions and transferred to the PVDF membrane. Afterwards, the membranes were incubated in Carbo Free blocking solution, probed with biotinylated PHA-E, PHA-L, MAA, SNA, AAA and GNA lectins and finally with extravidin-AP conjugate. The conjugated AP was detected via NBT/BCIP staining. Simultaneously, the samples were incubated with lectins preincubated overnight with the competitive sugar or CH<sub>3</sub>COOH.

**Table S1.** Sugar-binding specificities of lectin used for lectin blotting studies and composition of blocking solutions.

| Lectin                                       | Lectin-specific glycan structures                                                           | Blocking solution               |
|----------------------------------------------|---------------------------------------------------------------------------------------------|---------------------------------|
| Aleuria aurantia agglutinin (AAA)            | Fuα1,6GlcNAc-Asn<br>Fuα1,2Galβ1,4GlcNAcGalβ1,4(Fuα1,3)GlcNAc-                               | 0.5 M L-(-)-fucose)             |
| Galanthus nivalis agglutinin (GNA)           | Manα1,2Man-<br>Manα1,6Man-<br>Manα1,3Man-                                                   | 0.5 M methyl-α-Dmannopiranoside |
| Sambucus nigra agglutinin (SNA)              | NeuAcα2,6Gal-                                                                               | 0.4 M CH <sub>3</sub> COOH      |
| Maackia amurensis agglutinin (MAA)           | NeuAcα2,3Gal-                                                                               | 0.4 M CH <sub>3</sub> COOH      |
| Phaseolus vulgaris leucoagglutinin (PHA-L)   | Galβ1,4GlcNAcβ1,6Manα-<br>Galβ1,4GlcNAcβ1,2Manα-<br>(β1,6-branched structures of N-glycans) | 1 M N-acetyl-Dgalactosamine     |
| Phaseolus vulgaris erythroagglutinin (PHA-E) | Galβ1,4GlcNAcβ1,2Man (the bisecting GlcNAcβ1,4Man is essential)                             | 1 M N-acetyl-Dgalactosamine     |

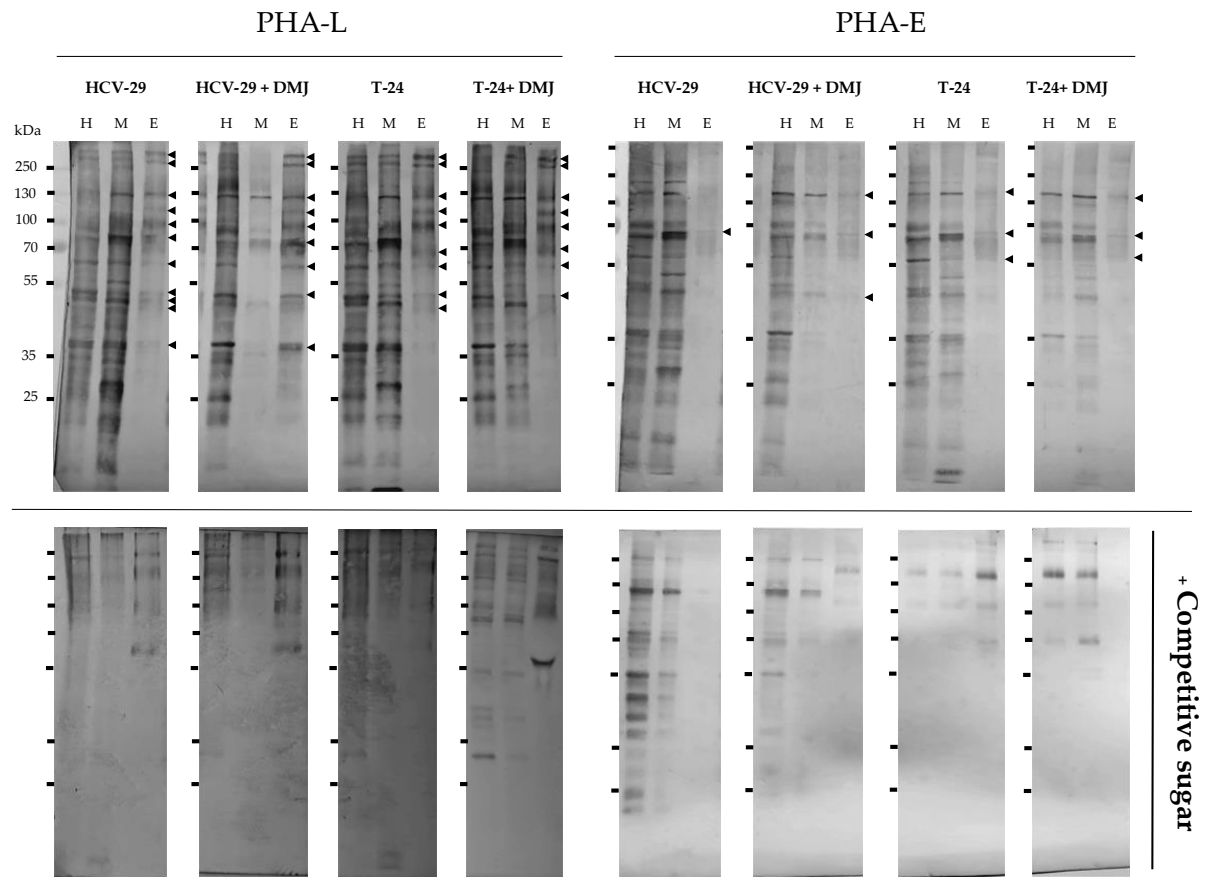

**Figure S1.** Detection of glycoproteins possessing  $\beta$ 1,6-branched tri- and/or tetraantennary complex type N-glycans (PHA-L-positive) and bisecting GlcNAc bound to the core mannose of complex type N-glycans (PHA-E-positive). Results of lectin blotting with PHA-L and PHA-E are shown in the upper panels. Controls with the competitive sugars are shown in the lower panels. The major specific bands were indicated on the right with arrowheads. H, the whole cell protein extract; M, the membrane fraction; E, the ectosomal fraction.

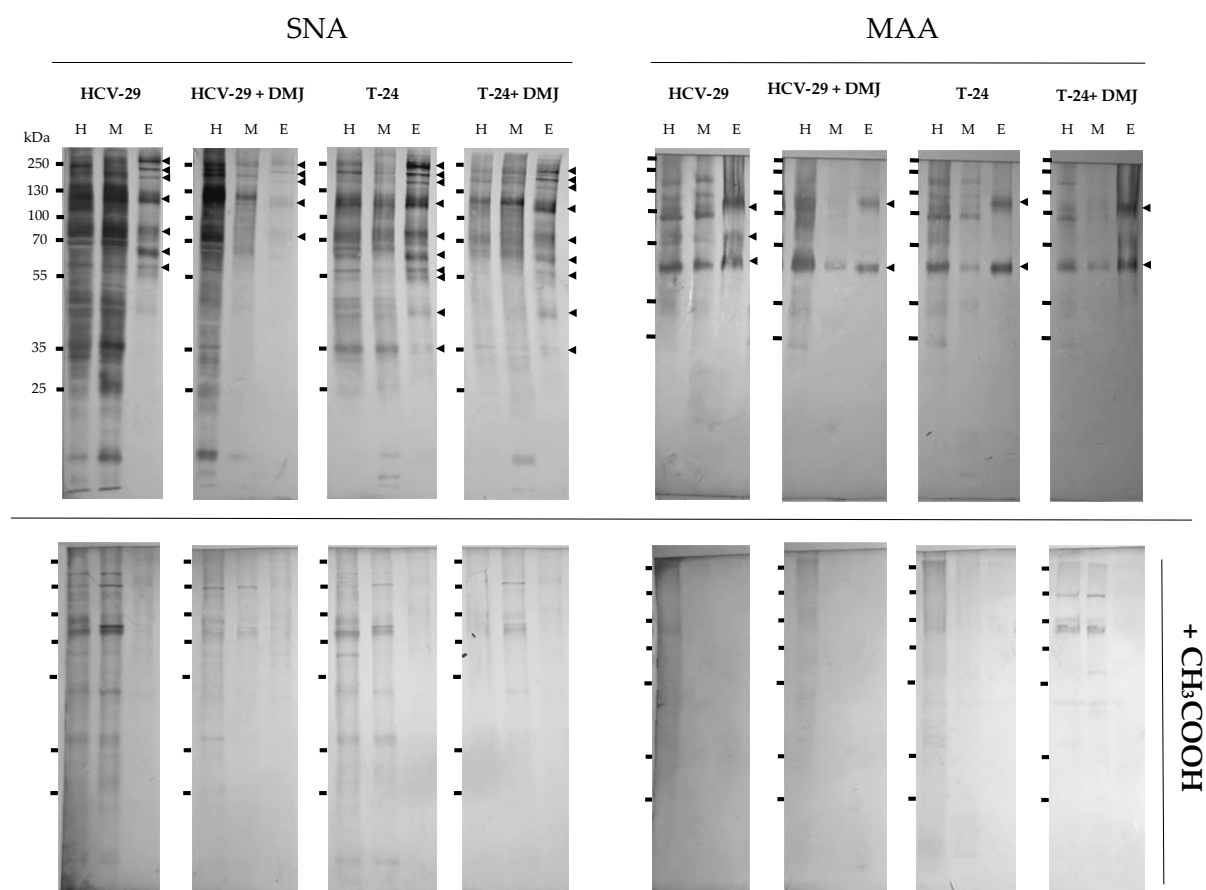

**Figure S2.** Detection of glycoproteins carrying  $\alpha$ 2,6-linked (SNA-positive) and  $\alpha$ 2,3-linked (MAA-positive) sialic acids. Results of lectin blotting with SNA and MAA are shown in the upper panels. Controls with the competitive sugars are shown in the lower panels. The major specific bands were indicated on the right with arrowheads. H, the whole cell protein extract; M, the membrane fraction; E, the ectosomal fraction.

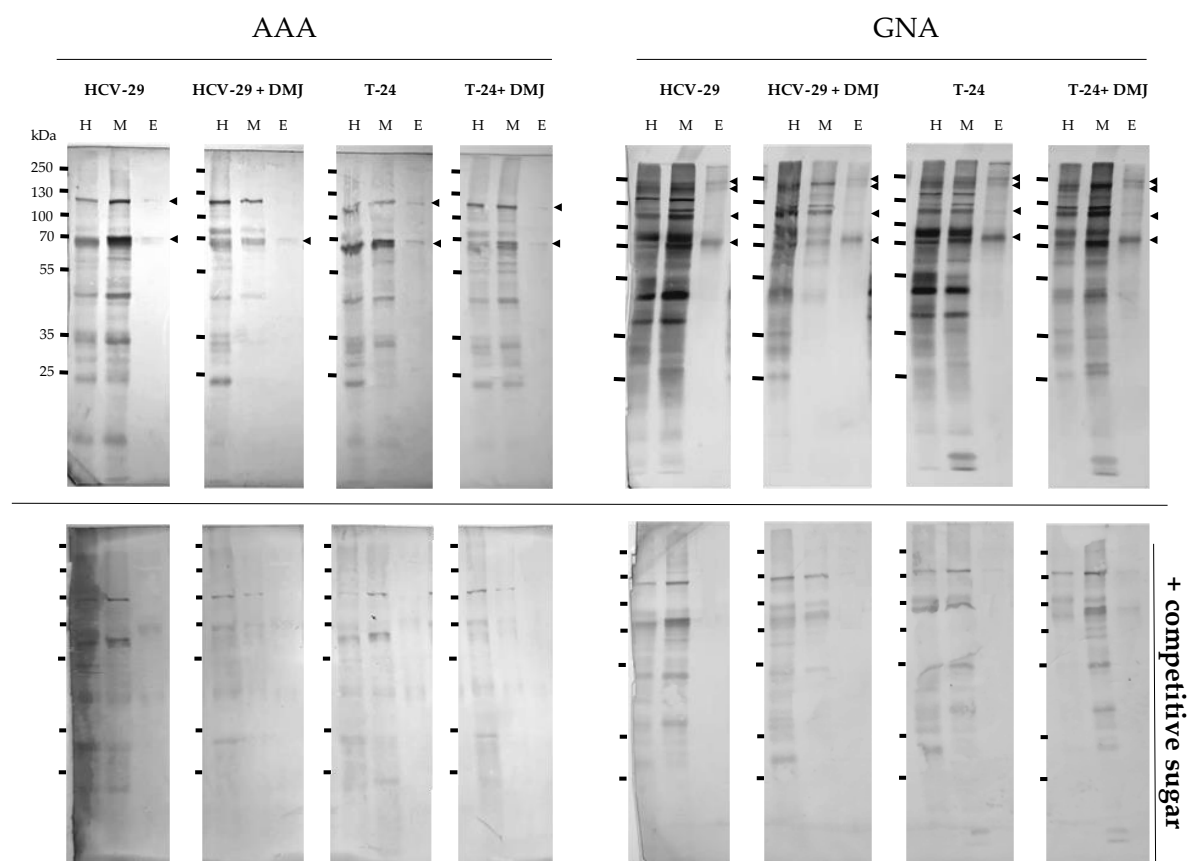

**Figure S3.** Detection of glycoproteins having fucose (AAA-positive) and mannose (GNA-positive) residues. Results of lectin blotting with AAA and GNA are shown in the upper panels. Controls with the competitive sugars are shown in the lower panels. The major specific bands were indicated on the right with arrowheads. H, the whole cell protein extract; M, the membrane fraction; E, the ectosomal fraction.
